# Supplementary material for: Development of a monoclonal antibody-based lateral flow immunoassay for the detection of benzoic acid in liquid food
Source: Royal Society of Chemistry journal article supplement (doi:10.1039/d3ay01403g), 2023-01-01
Supplement: d3ay01403g1.pdf [file d3ay01403g1.pdf]

1 **Supporting information for Analytical Methods**

2

3 **Development of a Monoclonal Antibody-Based Lateral Flow**

4 **Immunoassay for the Detection of Benzoic Acid in Liquid Food**

5 Qiuyan Zhao<sup>a</sup>, Mingyue Ding<sup>a</sup>, Dangshuai Pei<sup>b</sup>, Xiuhua Qi<sup>c</sup>, Yexuan Mao<sup>a</sup>, Xianqing Huang<sup>a</sup>,

6 Lianjun Song<sup>a</sup>, Jingnan Zuo<sup>a</sup>, Huijuan Yang<sup>d</sup>, Xiya Zhang<sup>a\*</sup>

7 <sup>a</sup>Henan Engineering Technology Research Center of Food Processing and Circulation  
8 Safety Control, College of Food Science and Technology, Henan Agricultural  
9 University, 63 Nongye Road, Zhengzhou, Henan 450002, China

10 <sup>b</sup>Weinan Animal Health Workstation, Weinan, Shaanxi 714000, China

11 <sup>c</sup>Department of Agriculture and Rural Affairs of Urumqi, 299 Junggar Street, Urumqi  
12 City, Xinjiang 830063, China

13 <sup>d</sup>Beijing Advanced Innovation Center for Food Nutrition and Human Health, College  
14 of Food Science & Nutritional Engineering, China Agricultural University, Beijing Key  
15 Laboratory of Detection Technology for Animal-Derived Food Safety, Beijing  
16 Laboratory for Food Quality and Safety, Beijing 100193, China

17 Qiuyan Zhao and Mingyue Ding contributed equally to this work.

18 \*Corresponding author: Xiya Zhang

19 *E-mail* addresses: [zhangxiya@henau.edu.cn](mailto:zhangxiya@henau.edu.cn) (X. Zhang).

## Contents

- 21 **1. Characterization of haptens, carrier protein and conjugates**
- 22 **2. ELISA procedure**
- 23 **3. Cloning of scFv-6D8 from hybridoma cells**
- 24 **4. Homology modeling of scFv-6D8**
- 25 **5. Characterization of eight sizes of the CGNPs**
- 26 **6. pH adjustment**
- 27 **7. Usage of CGNPs-mAbs optimization**
- 28 **8. References**

## 29 1. Characterization of haptens, carrier protein and conjugates

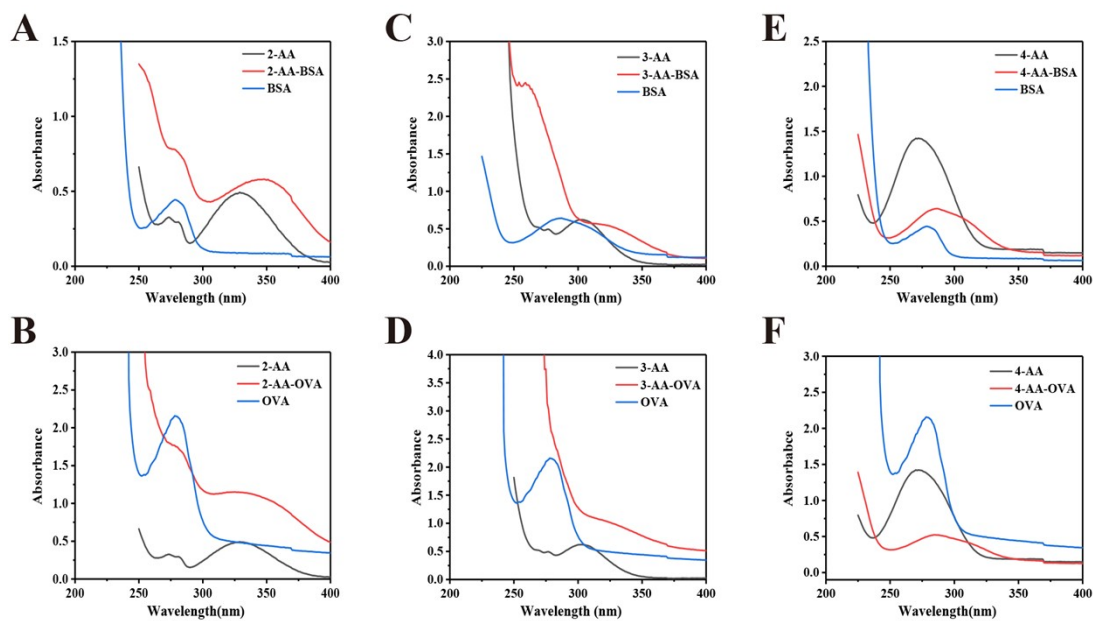

30

31 **Figure S1.** UV-Vis spectroscopy of haptens, carrier protein and conjugates; A, C, E: confirmation

32 of immunogens (2-AA-BSA, 3-AA-BSA and 4-AA-BSA); B, D, F confirmation of coating antigens

33 (2-AA-OVA, 3-AA-OVA and 4-AA-OVA).

34

## 35 **2. ELISA procedure**

36 The procedure of ELISA was as follows: the coating antigen was diluted with  
37 carbonate buffer (pH 9.6), and the dropped into a 96-well plate at 100  $\mu\text{L}/\text{well}$ . The  
38 plate was coated at 4  $^{\circ}\text{C}$  for 12 h, and discarded the coating solution. Subsequently, the  
39 plate was washed with PBST (10 mM PBS containing 0.5% tween-20) for three times,  
40 and 150  $\mu\text{L}/\text{well}$  of 3% skim milk was added for another 1 h at 37  $^{\circ}\text{C}$ . Then discarded  
41 the blocking buffer, 50  $\mu\text{L}/\text{well}$  10 mM PBS and 50  $\mu\text{L}/\text{well}$  antibody working solution  
42 were added in sequence into the well, and incubated at 37  $^{\circ}\text{C}$  for 30 min. After the  
43 washing procedure, 100  $\mu\text{L}/\text{well}$  of peroxidase-conjugated goat anti-mouse IgG  
44 (diluted 5000-folds) was added and incubated at 37  $^{\circ}\text{C}$  for 30 min. The plates were  
45 washed as above again, 100  $\mu\text{L}/\text{well}$  of substrate solution was added into the wells.  
46 Finally, the reaction was terminated by 50  $\mu\text{L}/\text{well}$  of 2M  $\text{H}_2\text{SO}_4$ , and measured at 450  
47 nm by using a microplate spectrophotometer.

48 For the icELISA procedure, the 50  $\mu\text{L}$  10 mM PBS was replaced by 50  $\mu\text{L}$  series  
49 concentration of BA standard solution.

50 **3. Cloning of scFv-6D8 from hybridoma cells**

51 The mAb 6D8 was IgG2a with kappa-type light chains characterized by a  
52 monoclonal antibody typing kit. The variable region of mAb 6D8 was sequenced  
53 according to our previous procedure.<sup>1</sup> As shown in Fig. S2 and S3, the total length of  
54 the scFv-6D8 gene was about 850 bp with the (Gly<sub>4</sub>Ser)<sub>4</sub> linker. The amino acid  
55 sequence of scFv-6D8 is shown in Tables S1.

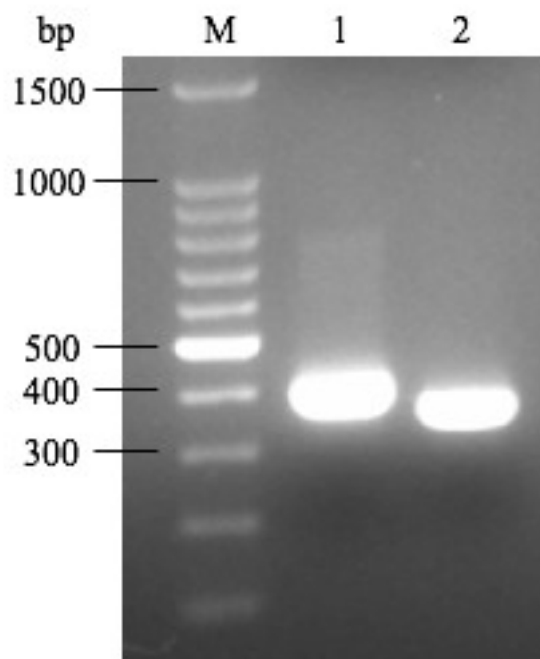

56

57 **Figure S2.** VH and VL genes of mAb 6D8. Lanes 1: VH gene; Lanes 2: VL gene; Lane

58 M: 100bp ladder DNA marker.

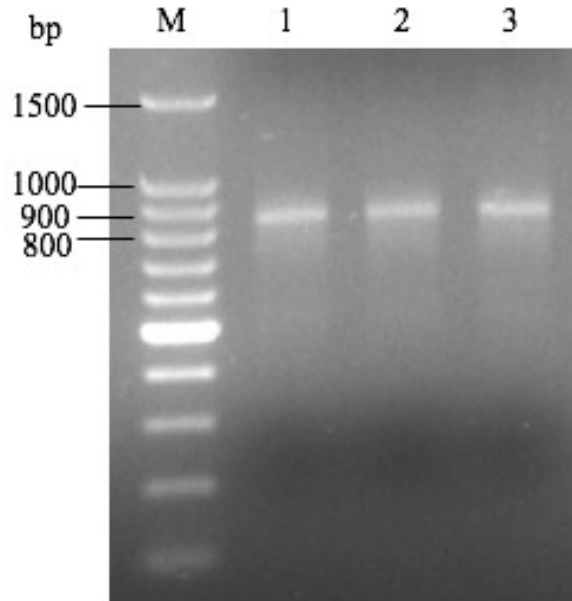

59

60 **Figure S3.** The scFv gene of mAb 6D8. Lanes 1–3: scFv gene of 1; Lane M: 100bp  
61 ladder DNA marker.

62

63 **Table S1.** The amino acid sequence of scFv-6D8.

|                                                                  |               |
|------------------------------------------------------------------|---------------|
| <b>CDR-H1</b>                                                    |               |
| QVQLKESGPGLVQPSQSL SITCTVS <b>AFSLTNYA</b> IHWVRQTPGKGLE         |               |
| <b>CDR-H2</b>                                                    |               |
| WLGVI <b>IWSGGST</b> DYNTAFMSRLSISKDNSKSQVFFKMNSLQADDTA          |               |
| <b>CDR-H3</b>                                                    | <b>Linker</b> |
| IYYC <b>ARTLRPY YVMDY</b> WGQGTSVTVSS <b>GGGGSGGGGSGGGGSG</b>    |               |
| <b>CDR-L1</b>                                                    |               |
| <b>GGGS</b> DVLMTQTPLSLPVS LGDQASISCRSS <b>QSLH SNGNTN</b> LHWYL |               |
| <b>CDR-L2</b>                                                    |               |
| QKPGQSPKLLIY <b>KVS</b> SRFSGVPDRFSGSGSGTDFTLKISRVEAEDLGV        |               |
| <b>CDR-L3</b>                                                    |               |
| YFC <b>SQSTHVPRT</b> FGGG TKLEIK                                 |               |

64

#### 65 **4. Homology modeling of scFv-6D8**

66 The three-dimensional structure of scFv-6D8 was predicted using MODELER  
67 according to the standard antibody modeling cascade (Discovery Studio 19.1).<sup>2</sup> The  
68 framework templates were identified at the first step by using 1MRD L for the variable  
69 light chain (VL) with 100.0% similarity, 1T2Q H (97.7% similarity) for the variable  
70 heavy chain (VH), and 4M7J LH for the VH/VL interface with 98.2% similarity to the  
71 mAb 6D8 sequence. Next, CDR conformations were built and refined based on the  
72 following homology templates: 1MRD, 1T66, 5MYK, 1A2Y, 4M93, 6C5K for CDR  
73 L1 (98.8% similarity), L2 (100.0% similarity), L3 (86.8% similarity), H1 (84.7%  
74 similarity), H2 (83.9%similarity) and H3 (76.0% similarity), respectively. Finally, a  
75 top-ranked model for the whole scFv-6D8 (Fig. S4A and S4B) was selected with PDF  
76 total energy of 2632.1, PDF physical energy of 201.2, and DOPE score of -25698.3.  
77 According to the Ramachandran plot figure (Figure S4C), 92.2% of residues were in  
78 the favored region, 4.8% of residues in the allowed region and 3% of residues in the  
79 outlier region. In addition, 92.2% of the residues had an averaged 3D-1D score of no  
80 less than 0.2 using the Verify 3D program (Figure S4D). These results indicated that  
81 the quality of the modeled 3D structure could be used as a model for molecular  
82 recognition in subsequent experiments.

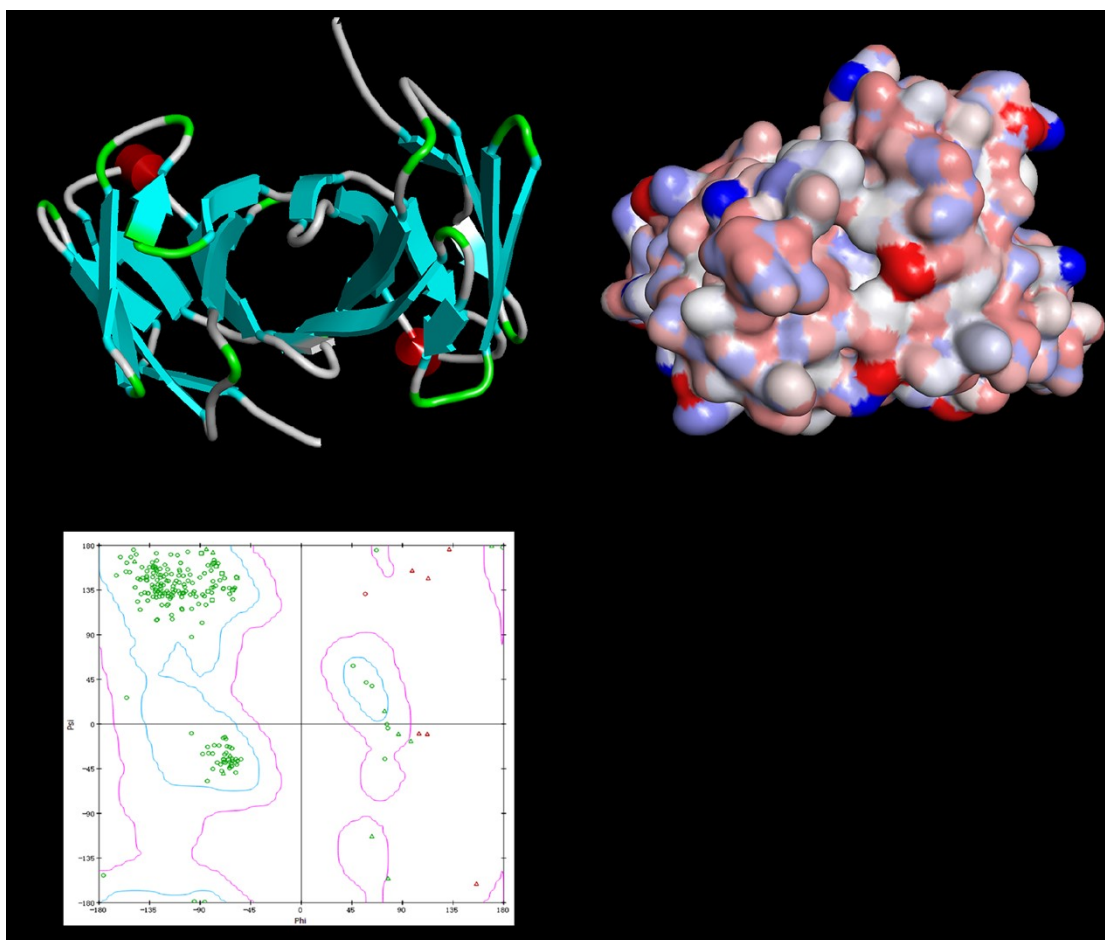

83

84 **Figure S4.** Structure prediction of scFv-6D8 (A and B). Validation by Ramachandran

85 plot (C) and 3D verify score (D) of scFv-6D8.

86

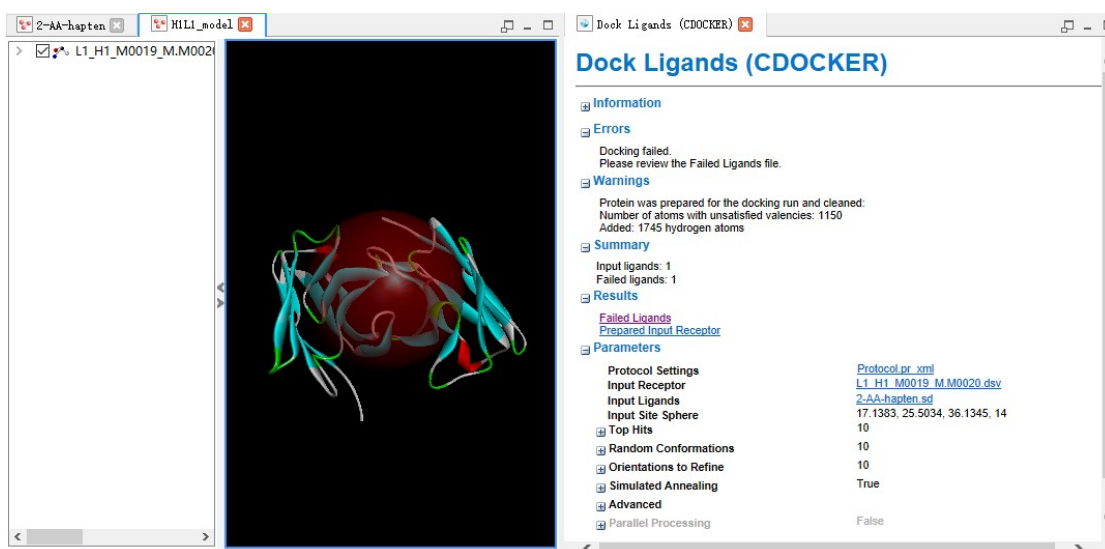

87

88 **Figure S5.** The results of the ligand of 2-AA docking with scFv-6D8.



## 89 5. Characterization of eight sizes of the CGNPs

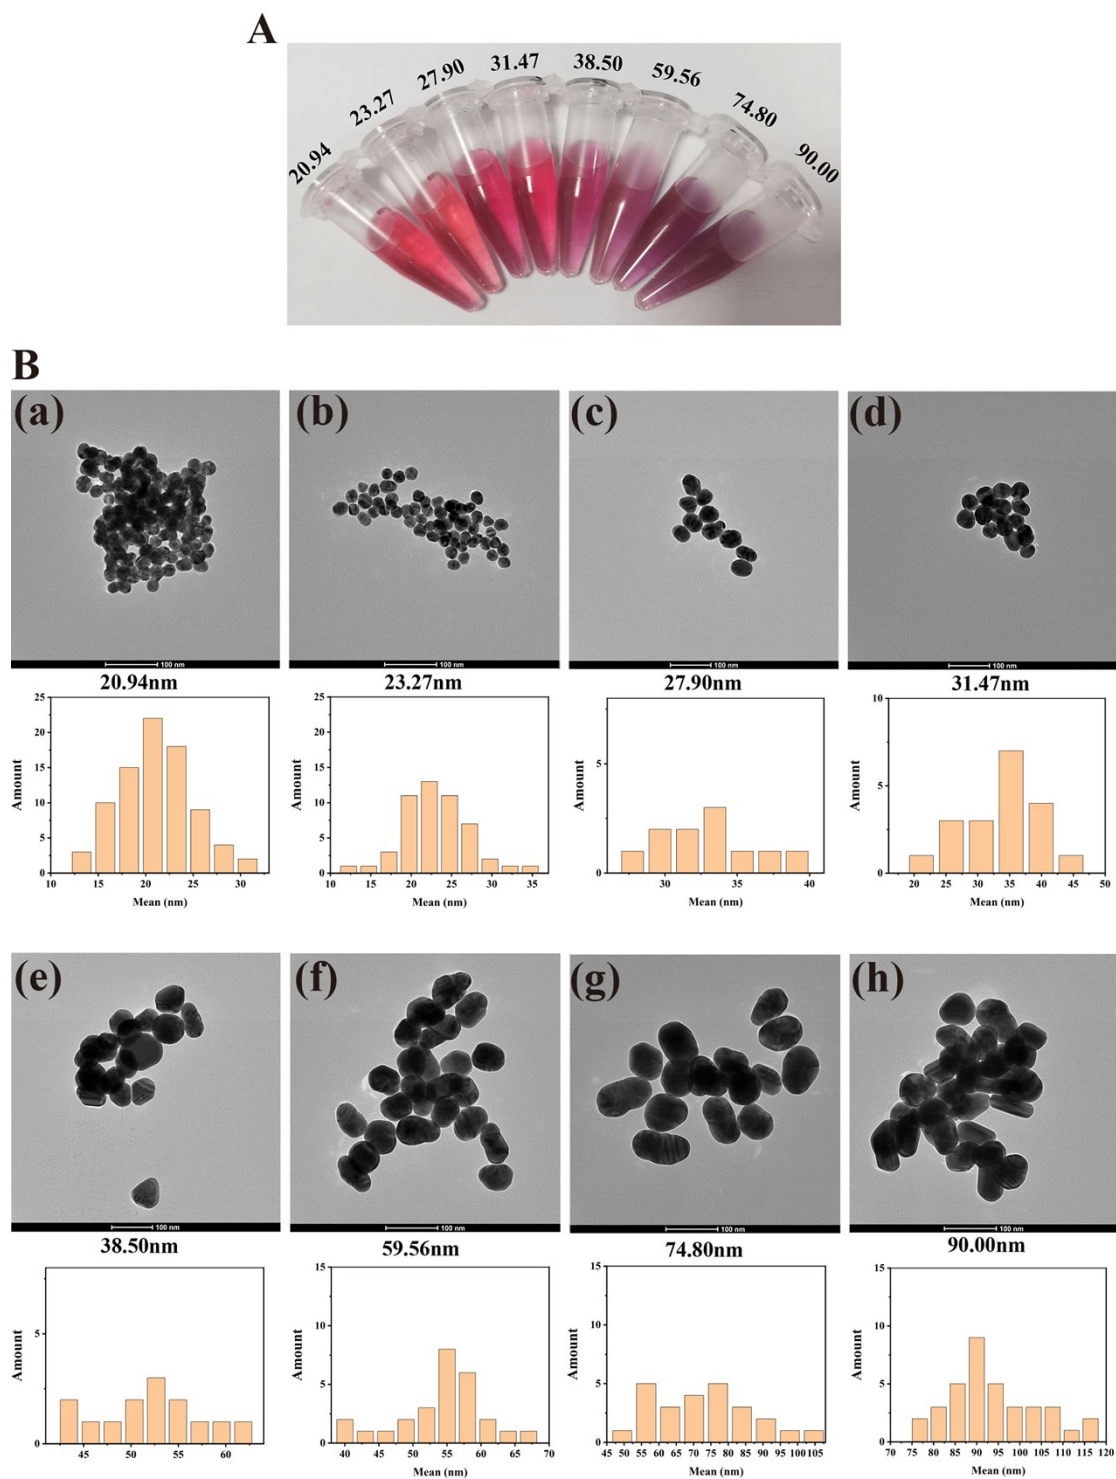

90

91 **Figure S6.** (A) Color of the CGNPs solution. (B) Different sizes of the CGNPs

92 characterized by TEM, and the corresponding particle size distribution.

93 **6. pH adjustment**

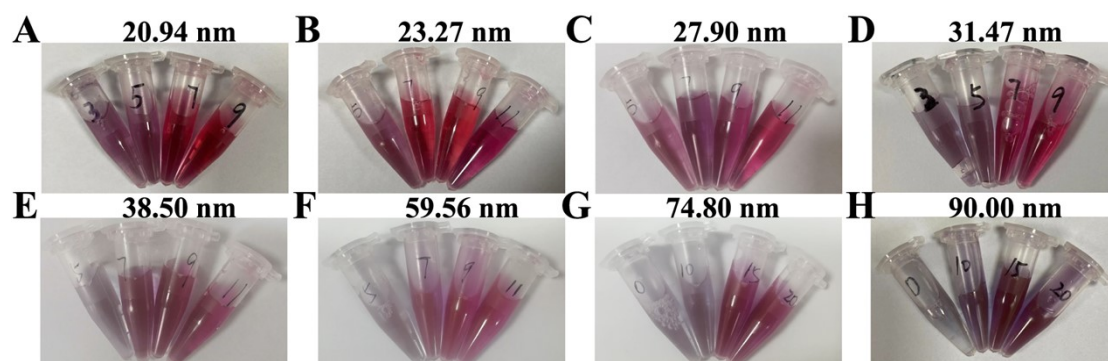

94

95 **Figure S7.** Optimized the pH adjust by 0.1 M  $K_2CO_3$ . 3  $\mu L$ , 5  $\mu L$ , 7  $\mu L$ , 9  $\mu L$  for 20.94  
96 nm CGNPs (A) and 31.47 nm CGNPs (D). 5  $\mu L$ , 7  $\mu L$ , 9  $\mu L$ , and 11  $\mu L$  for 23.27 nm  
97 (B), 27.9 nm (C), 38.5 nm, and 59.56 nm CGNPs (F). 0  $\mu L$ , 10  $\mu L$ , 15  $\mu L$  and 20  $\mu L$   
98 for 74.8 nm (G) and 90 nm CGNPs (H).

99 7. Usage of CGNPs-mAbs optimization

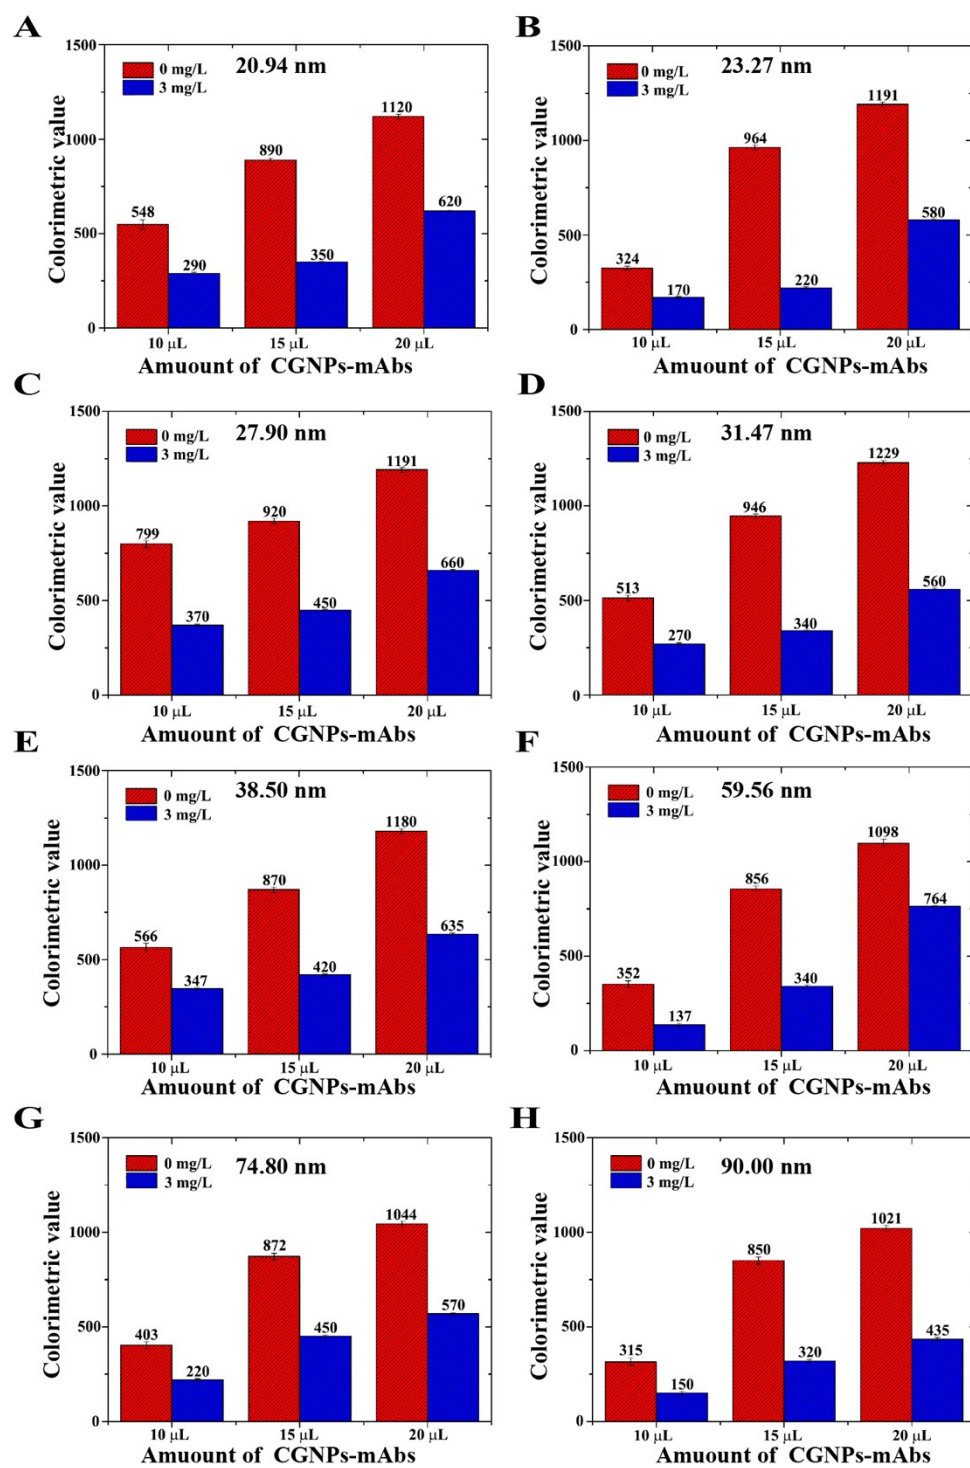

100

101 Figure S8. Optimized the usage of CGNPs-mAbs.

## 102 **8. Conditions and procedures for UV and HPLC analysis.**

### 103 **8.1 Sample preparation for UV spectroscopy detection**

104 50 mL of the liquid samples were first ultrasounded at 50 °C for 20 min. Then, 10  
105 mL of the samples was added into a 50 mL separatory funnel. Subsequently, 2 mL 3 M  
106 HCl was added, and the solution was extracted with 20 mL ether for four times. The  
107 ether were combined, and was further extracted by 20 mL 5% Na<sub>2</sub>HPO<sub>4</sub> for four times.  
108 Combined the aqueous phase into a 100 mL beaker, and placed in a 60 °C water solution  
109 to remove the ether. Finally, the aqueous phase into a 100 mL volumetric bottle, and  
110 set volume to 100 mL for the detection of UV spectroscopy detection.

### 111 **8.2 Sample preparation for HPLC-UV detection**

112 10 mL of milk was added into a 50 mL separatory funnel. Subsequently, 2 mL 3  
113 M HCl was added, and the solution was extracted with 20 mL ether for two times. The  
114 ether was combined and dried under N<sub>2</sub>. Then the residue was dissolved with 2 mL of  
115 methanol. Finally, the solution was taken through membrane (0.22 μm) to be  
116 determined by HPLC-UV.

117 10 mL of the Fanta, Sprite, Coca Cola, or Smart samples were first ultrasounded  
118 at 50 °C for 20 min. Subsequently, 2 mL of the liquid samples were diluted 10-fold by  
119 deionized water, and were taken through membrane (0.22 μm) to be determined by  
120 HPLC-UV.

### 121 **8.3 Conditions of the HPLC**

122 Column used was a C18 (4.6 mm × 150 mm × 5 μm), mobile phase is ammonium  
123 acetate containing 5% methyl alcohol, flow rate was 1 mL/min, injection volume is 10

124  $\mu\text{L}$ , and the measure wavelength is 230 nm. The limited of detection (LOD) and limit  
125 of quantification (LOQ) of BA were 0.10 mg/kg and 0.20 mg/kg, respectively.  
126 Moreover, the result indicated that the concentration of BA in milk sample was below  
127 0.10 mg/kg, which was no effect on our developed LFA.

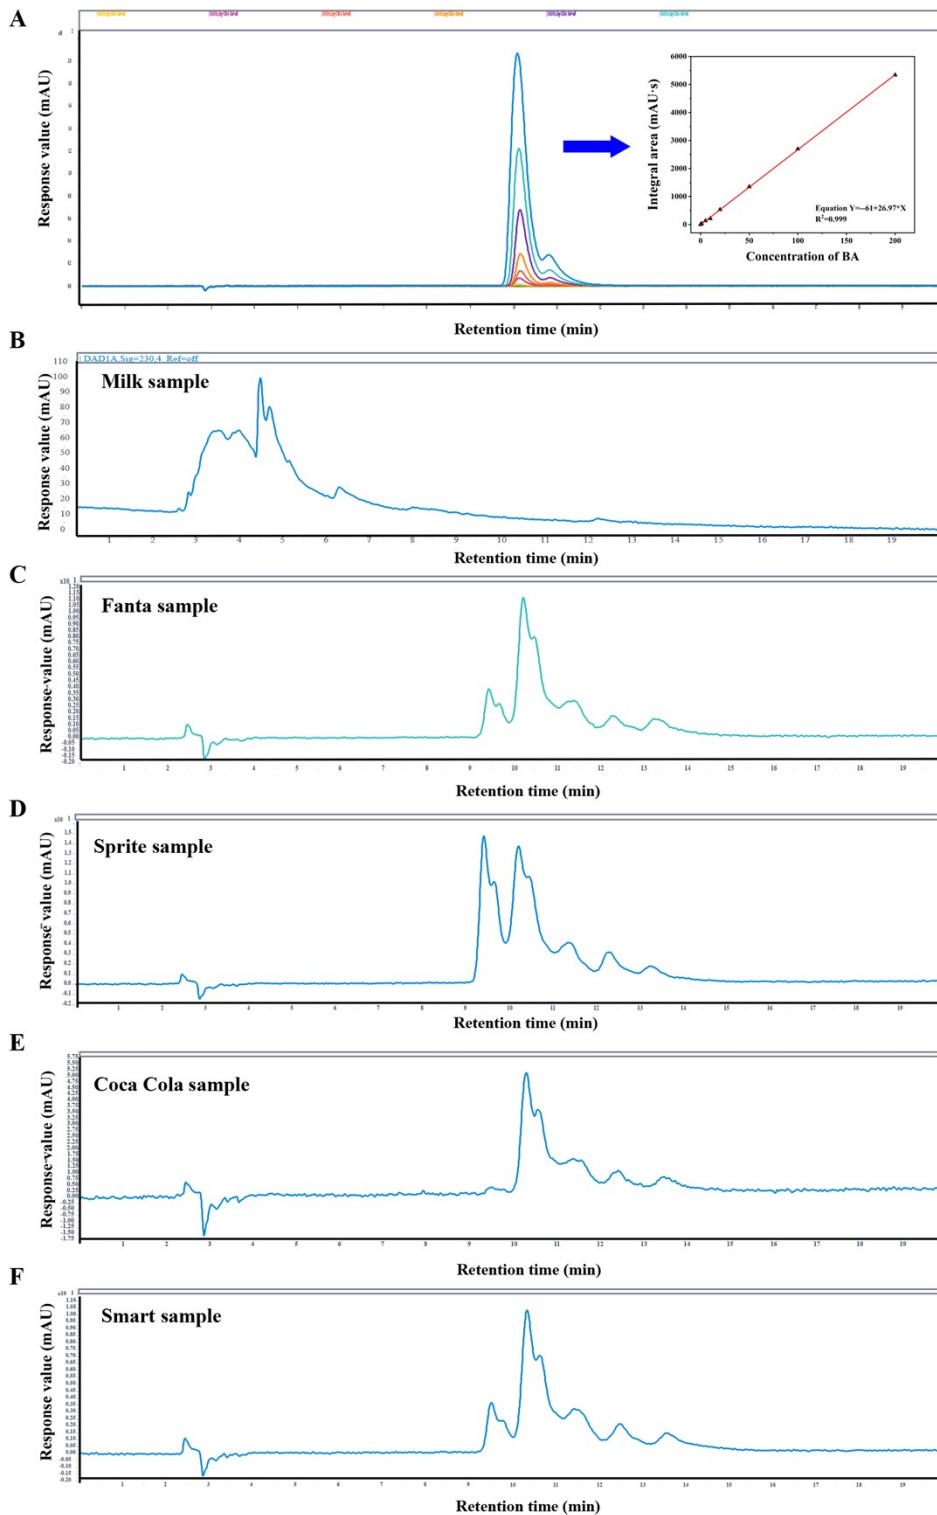

129 **Figure S9.** The HPLC chromatogram of standard solution of BA (concentration with  
130 0, 0.5, 1, 5, 25, 50, 100 and 200 mg/L, respectively) (A); The HPLC analysis results for  
131 milk, Fanta, Sprite, Coca cola and Smart sample, respectively. (B-F)

## 132 **9. References**

- 133 1. X. Zhang, X. Zhang, L. Song, X. Huang, Y. Li, M. Qiao, W. Liu, T. Zhang, Y. Qi,  
134 W. Wang, X. Yu, L. Dou, H. Yang, L. Wang, Y. Mao and Z. Wang, *Microchim Acta*  
135 **188**(2), 59. doi: 10.1007/s00604-021-04715-2.
- 136 2. C. Li, X. Liang, K. Wen, Y. Li, X. Zhang, M. Ma, X. Yu, W. Yu, J. Shen and Z.  
137 Wang, *Anal. Chem*, 2019, **91**, 2392-2400. doi: 10.1021/acs.analchem.8b05174.
